# Supplementary material for: Highly Efficient Photocathodic Protection Performance of 2D/2D ZIS@CNNs Composites under Visible Light
Source: Preprints.org preprint supplement (doi:10.20944/preprints202307.0233.v1), 2023-07-05
Supplement: Supplementary file 1 [file supplementary]

**Highly efficient photocathodic protection performance of 2D/2D ZIS@CNNs composites under visible light**

Weitao Lia, Zhanyuan Yang a, Yanhui Li a, b, Pengfei Zhang a, Hong Li a *

a College of Mechanical and Electrical Engineering, Qingdao University, 308 Ningxia Road, Qingdao 266071, China

b State Key Laboratory of Bio-Fibers and Eco-Textiles, Qingdao University, 308 Ningxia Road, Qingdao 266071, China

**Corresponding Author**

*****Hong Li. Email: [lhqdio1987@163.com](mailto:lhqdio1987@163.com). Tel: + 86-532-85953679

**Email addresses**

WTL: Lwtsty2022@163.com; ZYY: [yzyqdu@163.com](mailto:yzyqdu@163.com); YHL: liyanhui@tsinghua.org.cn; PFZ: pzhan12@qq.com; HL: lhqdio1987@163.com


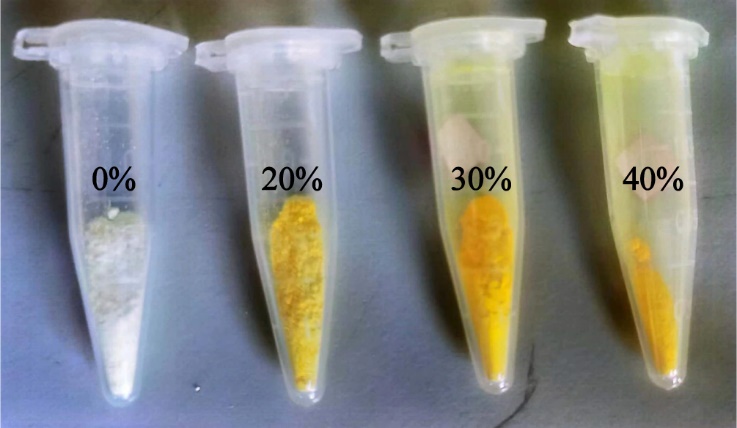


**Fig. S1.** Picture of CNNs and three different ZIS@CNNs composite material.


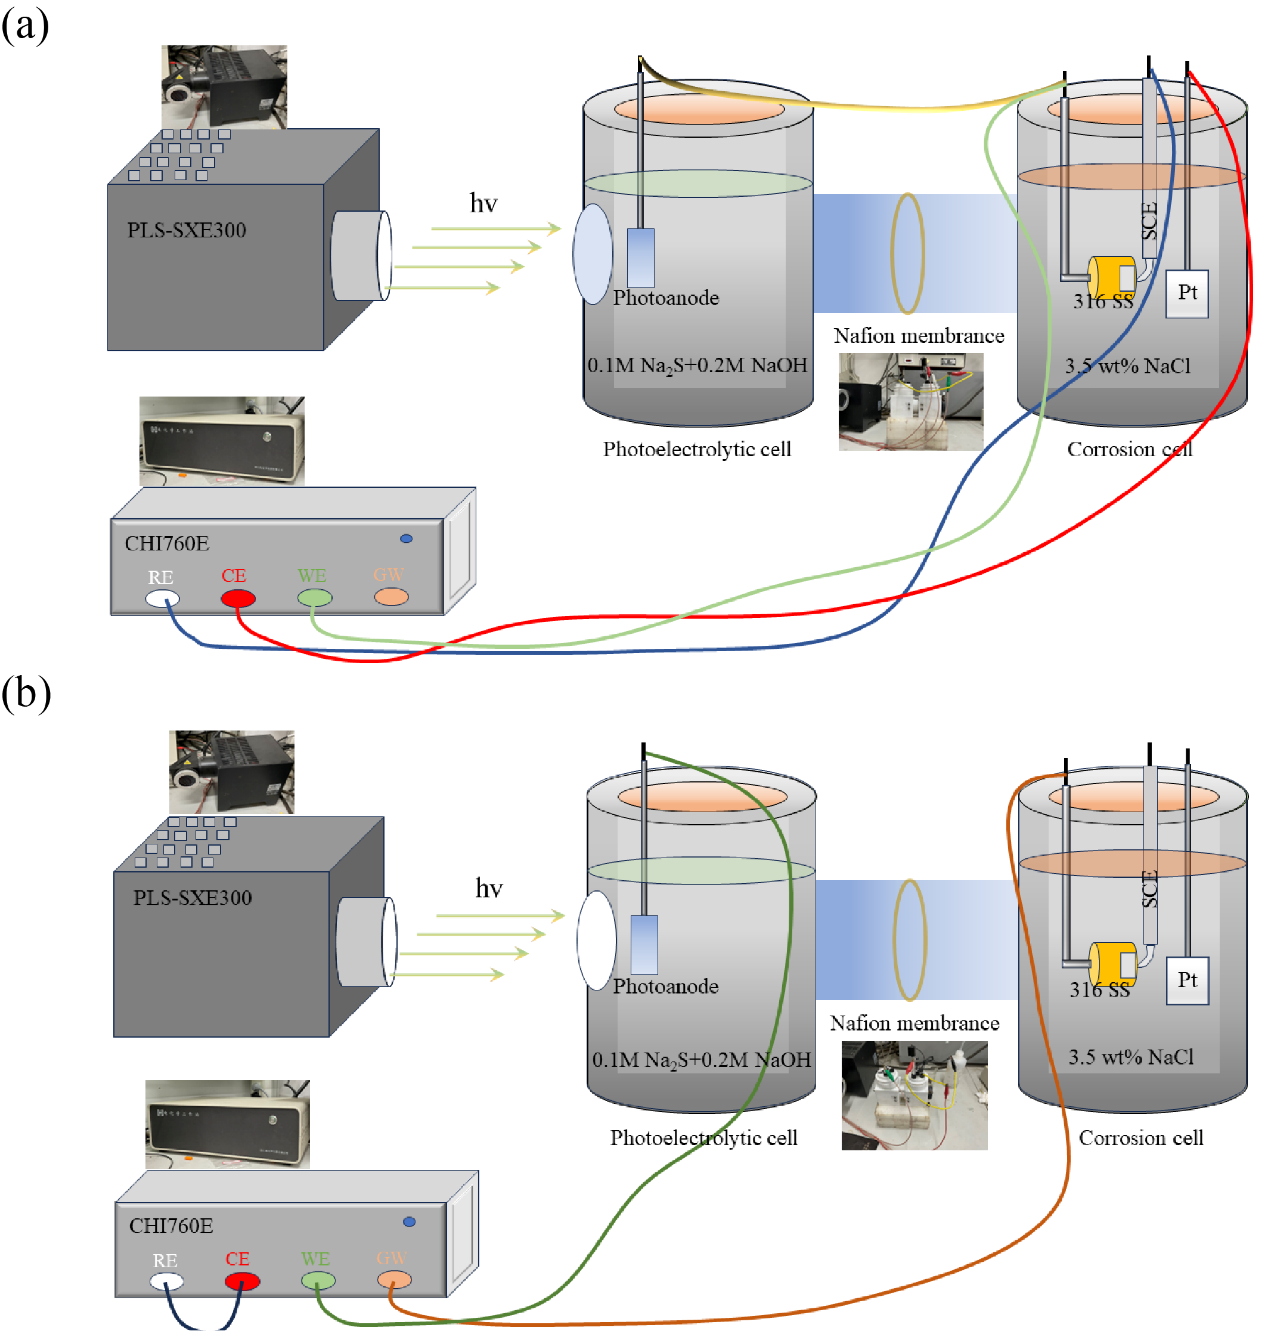


**Fig. S2.** Schematic diagrams of experimental setup for (a) OCP, EIS, Tafel (b) photocurrent densities tests.


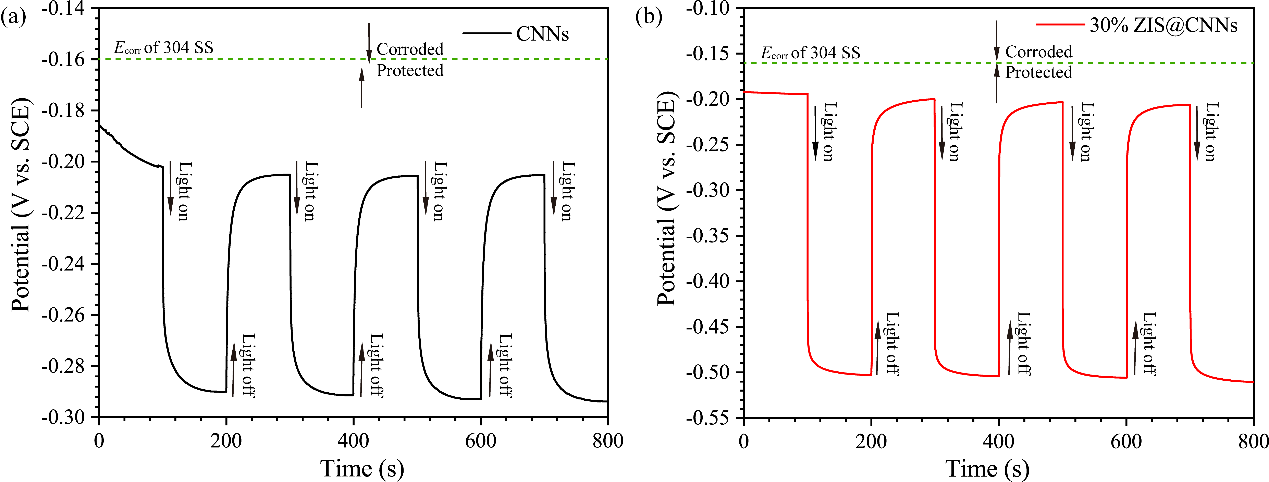


**Fig. S3.** OCP-t curves of 304 SS coupled with CNNs and 30% ZIS@CNNs composite.

**Table S1** Comparison of 2D/2D ZIS@CNNs photoanode with other photoanodes.

| Samples | Metal | Photocurrent density | Ref |
| --- | --- | --- | --- |
| WO3/ZnWO4/ZnO | 316L SS | 8 μA·cm−2 | [1] |
| 1D-p-g-C3N4@RGO | 304 SS | 10 μA cm–2 | [2] |
| SrTiO3 | 304 SS | 9.2 μA cm–2 | [3] |
| C-vacancy g-C3N4/GO/WO3 | 304 SS | 16 μA cm–2 | [4] |
| g-C3N4/rGO/ZnS | 304 SS | 15 μA cm–2 | [5] |
| STO/g-CN | 304 SS | 8.2 μA·cm−2 | [6] |
| polyaniline/graphitic carbon nitride | Fe | 11 μA·cm−2 | [7] |
| g-C3N4/epoxy | Q235 | 0.4 μA·cm−2 | [8] |
| 2D/2D ZIS@CNNs | 316 SS | 17 μA cm–2 | This work |

**References**

[1] Feng, C.; Chen, Z. ; Tian, J.; Jing, J.; Ma, L.; Hou, J. Fabrication of three-dimensional WO3/ZnWO4/ZnO multiphase heterojunction system with electron storage capability for significantly enhanced photoinduced cathodic protection performance. *J Mater Sci Technol*, **2021**, 90, 183-193.

[2] Qian, B.; Yang, X.; Li, X.; Song, Z. Fabrication of 1D/2D p-g-C3N4@RGO heterostructures with superior visible-light photoelectrochemical cathodic protection performance. *J Solid State Electr*, **2020**, 24, 1669-1678.

[3] Kong, C.; Su, X.; Qing, D.; Zhao, Y.; Wang, J.; Zeng, X. Controlled synthesis of various SrTiO3 morphologies and their effects on photoelectrochemical cathodic protection performance. *Ceram Int*, **2022**, 48, 20228-20236.

[4]. Zheng, H.; Zheng, H.; Jiang, S.; Liu, Y.; Sun, X.; Wang, D.; Zhou, Y.; Zhu, M.; Zhang, D.; Zhang, L. Improved photocathodic protection performance of C-vacancy g-C3N4/GO/WO3 for 304 stainless steel. *J Phys Chem Solids*, **2022**, 160, 110270.

[5] Zheng, H; Liu, Y.; Zhou, Y.; Zhao, D.; Yun, L.; Zhang, D.; Zhang, L. Improved photocathodic protection performance of g-C3N4/rGO/ZnS for 304 stainless steel. *J Phys Chem Solids*, **2021**, 148, 109672.

[6] Kong, C.; Qing, D.; Su, X.; Zhao, Y.; Wang, J.; Zeng, X. Improved photoelectrochemical cathodic protection properties of a flower-like SrTiO3 photoanode decorated with g-C3N4, *J Alloy Compd*, **2022**, 924, 166629.

[7] Guo, F.; Li, L.; Shi, Y.; Shi, W.; Yang, X.; Li, H. Achieving superior anticorrosion and antibiofouling performance of polyaniline/graphitic carbon nitride composite coating, *Prog Org Coat*, **2023**, 179, 107512.

[8] Guo, F.; Li, L.; Shi, Y.; Shi, W.; Yang, X. Synthesis of N-deficient g-C3N4/epoxy composite coating for enhanced photocatalytic corrosion resistance and water purification. *J Mater Sci*, **2023**, 58, 4223-4239.
